# Supplementary material
Source: MDPI journal article supplement (https://www.mdpi.com/2311-5629/9/2/41)
Supplement: s1 [file s1]

# **The smallest hyperbolic paraboloid hydrocarbon: A high-level ab initio perspective**

Amir Karton\*

School of Science and Technology, University of New England, Armidale, NSW 2351, Australia.

## **S U P P O R T I N G   I N F O R M A T I O N**

(Tables S1 and S2, total x pages)

\*E-Mail: [amir.karton@une.edu.au](mailto:amir.karton@une.edu.au)

**Table S1.** CCSD(T) energies relative to isomer **1** (in kJ mol<sup>-1</sup>) obtained from G4(MP2) theory for the fourteen C<sub>13</sub>H<sub>8</sub> isomers shown in Schemes 1 and 2 and transition structures in Fig 1.

|                         | $\Delta E_e$ | $\Delta H_0$ | $\Delta H_{298}$ |
|-------------------------|--------------|--------------|------------------|
| <b>1</b>                | 0.0          | 0.0          | 0.0              |
| <b>2</b>                | 23.2         | 16.0         | 25.4             |
| <b>3</b>                | 33.4         | 22.8         | 31.9             |
| <b>5</b>                | 37.3         | 26.1         | 35.8             |
| <b>4</b>                | 37.4         | 26.4         | 36.0             |
| <b>6</b>                | 60.5         | 41.9         | 52.3             |
| <b>7</b>                | 60.6         | 42.4         | 52.6             |
| <b>8</b>                | 62.9         | 44.2         | 54.5             |
| <b>10</b>               | 58.3         | 49.1         | 57.4             |
| <b>9</b>                | 66.8         | 47.7         | 58.5             |
| <b>11</b>               | 291.6        | 273.0        | 287.0            |
| <b>12</b>               | 293.6        | 274.4        | 288.7            |
| <b>13</b>               | 364.1        | 360.4        | 361.8            |
| <b>14</b>               | 511.4        | 485.5        | 500.9            |
| <b>1-TS<sup>a</sup></b> | 261.6        | 246.4        | 248.1            |
| <b>1-TS<sup>b</sup></b> | 76.9         | 70.7         | 69.9             |

<sup>a</sup>Transition structure of **1** for skeletal inversion (see Figure 1b). <sup>a</sup>Transition structure of **1** for  $\pi$ -bond shift (see Figure 1c).

**Table S2.** B3LYP/6-31G(2df,p) optimized structures (Cartesian coordinates in Å)

|   | <b>1</b>  |           |           |
|---|-----------|-----------|-----------|
| C | 0.000000  | 0.000000  | 0.000000  |
| C | 1.041606  | 1.023788  | 0.554287  |
| C | -1.041606 | 1.023788  | -0.554287 |
| C | -1.041606 | -1.023788 | 0.554287  |
| C | 1.041606  | -1.023788 | -0.554287 |
| C | -0.648396 | -2.303202 | 0.314702  |
| C | 2.421173  | 0.550781  | 0.384153  |
| C | -2.421173 | -0.550781 | 0.384153  |
| C | 0.648396  | 2.303202  | 0.314702  |
| C | 2.421173  | -0.550781 | -0.384153 |
| C | -2.421173 | 0.550781  | -0.384153 |
| C | -0.648396 | 2.303202  | -0.314702 |
| C | 0.648396  | -2.303202 | -0.314702 |
| H | -1.283116 | 3.171408  | -0.448390 |
| H | 1.283116  | 3.171408  | 0.448390  |
| H | 3.289262  | 1.111118  | 0.708482  |
| H | 3.289262  | -1.111118 | -0.708482 |
| H | 1.283116  | -3.171408 | -0.448390 |
| H | -1.283116 | -3.171408 | 0.448390  |
| H | -3.289262 | -1.111118 | 0.708482  |
| H | -3.289262 | 1.111118  | -0.708482 |

|   | <b>2</b>  |           |           |
|---|-----------|-----------|-----------|
| C | 2.916156  | -1.211981 | -0.000024 |
| C | 4.304611  | -1.206731 | 0.000485  |
| C | 5.003837  | -0.000484 | 0.000741  |
| C | 4.305199  | 1.206106  | 0.000478  |
| C | 2.916747  | 1.212036  | -0.000019 |
| C | 2.201122  | 0.000202  | -0.000278 |
| H | 4.843957  | -2.147995 | 0.000693  |
| H | 4.845005  | 2.147106  | 0.000692  |
| C | 0.784686  | 0.000559  | -0.000693 |
| C | -0.432839 | 0.000708  | -0.000946 |
| H | 2.367924  | -2.146950 | -0.000202 |
| H | 2.368971  | 2.147273  | -0.000205 |
| C | -1.780401 | 0.000371  | -0.001052 |
| C | -3.001248 | 0.000123  | -0.000940 |
| C | -4.351595 | -0.000021 | -0.000504 |
| C | -5.564874 | -0.000170 | 0.000175  |
| H | 6.088528  | -0.000749 | 0.001144  |
| C | -7.015064 | -0.000320 | 0.001393  |
| H | -7.410151 | -0.002607 | 1.023762  |
| H | -7.411214 | 0.885912  | -0.507439 |

|   |           |           |           |
|---|-----------|-----------|-----------|
| H | -7.411036 | -0.884380 | -0.511339 |
|---|-----------|-----------|-----------|

**3**

|   |           |           |           |
|---|-----------|-----------|-----------|
| C | -1.993691 | -1.520380 | 0.000011  |
| C | -3.379678 | -1.582082 | -0.000010 |
| C | -4.121513 | -0.403126 | -0.000041 |
| C | -3.472109 | 0.829460  | -0.000053 |
| C | -2.081927 | 0.922194  | -0.000032 |
| C | -1.331810 | -0.279234 | 0.000001  |
| H | -3.878236 | -2.545110 | -0.000003 |
| C | 0.083741  | -0.241865 | 0.000029  |
| C | 1.301260  | -0.206626 | 0.000073  |
| H | -1.400775 | -2.427856 | 0.000034  |
| C | 2.647927  | -0.170048 | 0.000091  |
| C | 3.867611  | -0.135801 | 0.000113  |
| C | 5.218791  | -0.097080 | 0.000009  |
| C | 6.428525  | -0.062092 | -0.000111 |
| H | 7.489839  | -0.031515 | -0.000190 |
| H | -5.205708 | -0.441094 | -0.000058 |
| H | -4.057185 | 1.743968  | -0.000082 |
| C | -1.390606 | 2.259629  | -0.000024 |
| H | -0.745577 | 2.373895  | 0.877962  |
| H | -0.745135 | 2.373685  | -0.877709 |
| H | -2.116346 | 3.076336  | -0.000296 |

**4**

|   |           |           |           |
|---|-----------|-----------|-----------|
| C | -1.635325 | -1.618236 | 0.001149  |
| C | -3.020946 | -1.714136 | 0.000767  |
| C | -3.807350 | -0.566138 | -0.000793 |
| C | -3.223764 | 0.707252  | -0.001632 |
| C | -1.835319 | 0.799090  | -0.002072 |
| C | -1.025645 | -0.352503 | -0.000368 |
| H | -3.491566 | -2.691635 | 0.000972  |
| C | 0.385693  | -0.232974 | -0.000692 |
| C | 1.598283  | -0.124863 | -0.000651 |
| H | -1.016418 | -2.507616 | 0.001852  |
| C | 2.940490  | -0.007448 | -0.000403 |
| C | 4.155863  | 0.099265  | -0.000054 |
| C | 5.502489  | 0.217571  | 0.000418  |
| C | 6.708064  | 0.323458  | 0.000754  |
| H | 7.765736  | 0.416319  | 0.001165  |
| H | -4.889698 | -0.655980 | -0.001834 |
| C | -4.085738 | 1.946088  | 0.001894  |
| H | -3.480511 | 2.853926  | -0.058168 |
| H | -4.781407 | 1.947886  | -0.844219 |
| H | -4.689836 | 2.005878  | 0.914262  |

|   |           |          |           |
|---|-----------|----------|-----------|
| H | -1.357082 | 1.772668 | -0.003946 |
|---|-----------|----------|-----------|

### 5

|   |           |           |           |
|---|-----------|-----------|-----------|
| C | -1.619238 | 1.208563  | -0.005016 |
| C | -3.005994 | 1.199999  | -0.008640 |
| C | -3.726013 | 0.000072  | -0.007152 |
| C | -3.006124 | -1.199940 | -0.008648 |
| C | -1.619373 | -1.208657 | -0.005025 |
| C | -0.899641 | -0.000085 | -0.002340 |
| H | -3.543167 | 2.143708  | -0.014422 |
| H | -3.543401 | -2.143591 | -0.014438 |
| C | -5.233142 | 0.000140  | 0.019914  |
| C | 0.515553  | -0.000165 | -0.001906 |
| C | 1.733142  | -0.000186 | -0.000904 |
| H | -1.076508 | 2.146842  | -0.008293 |
| H | -1.076746 | -2.146994 | -0.008309 |
| C | 3.080338  | -0.000059 | 0.000360  |
| C | 4.300483  | 0.000022  | 0.001596  |
| C | 5.652264  | 0.000111  | 0.002963  |
| C | 6.862527  | 0.000141  | 0.004218  |
| H | 7.924240  | -0.000144 | 0.005280  |
| H | -5.642085 | 0.886648  | -0.473088 |
| H | -5.642182 | -0.885786 | -0.474060 |
| H | -5.608843 | -0.000418 | 1.050812  |

### 6

|   |           |           |           |
|---|-----------|-----------|-----------|
| C | 1.779232  | -0.852871 | 0.000000  |
| C | 0.835952  | -1.861702 | 0.000000  |
| C | -0.538602 | -1.564815 | 0.000000  |
| C | -0.968546 | -0.223204 | 0.000000  |
| C | 0.000000  | 0.801565  | 0.000000  |
| C | 1.382083  | 0.491405  | 0.000000  |
| C | -0.420373 | 2.161673  | 0.000000  |
| C | -0.795673 | 3.306118  | 0.000000  |
| H | -1.111883 | 4.319784  | 0.000000  |
| C | 2.366613  | 1.516869  | 0.000000  |
| C | 3.224406  | 2.362192  | 0.000000  |
| H | 3.970340  | 3.117836  | 0.000000  |
| C | -2.430664 | 0.134827  | 0.000000  |
| H | -2.681740 | 0.740342  | 0.877202  |
| H | -2.681740 | 0.740342  | -0.877202 |
| H | -3.055594 | -0.758185 | 0.000000  |
| H | 2.836760  | -1.087931 | 0.000000  |
| H | 1.146294  | -2.899932 | 0.000000  |
| C | -1.467853 | -2.646235 | 0.000000  |
| C | -2.221600 | -3.586266 | 0.000000  |

|   |           |           |          |
|---|-----------|-----------|----------|
| H | -2.892288 | -4.409591 | 0.000000 |
|---|-----------|-----------|----------|

7

|   |           |           |           |
|---|-----------|-----------|-----------|
| C | 0.800366  | -1.262750 | 0.000000  |
| C | -0.516696 | -1.730863 | 0.000000  |
| C | -1.568735 | -0.800472 | 0.000000  |
| C | -1.333229 | 0.568518  | 0.000000  |
| C | 0.000000  | 1.035720  | 0.000000  |
| C | 1.071688  | 0.108018  | 0.000000  |
| C | 0.259981  | 2.432973  | 0.000000  |
| C | 0.452073  | 3.622432  | 0.000000  |
| H | 0.638801  | 4.667746  | 0.000000  |
| C | 2.424354  | 0.551957  | 0.000000  |
| C | 3.576801  | 0.899992  | 0.000000  |
| H | 4.589487  | 1.219137  | 0.000000  |
| H | -2.589475 | -1.166256 | 0.000000  |
| C | -2.480985 | 1.544272  | 0.000000  |
| H | -2.443126 | 2.198294  | 0.877441  |
| H | -2.443126 | 2.198294  | -0.877441 |
| H | -3.439871 | 1.021097  | 0.000000  |
| H | 1.623618  | -1.965751 | 0.000000  |
| C | -0.787492 | -3.128752 | 0.000000  |
| C | -1.017581 | -4.310904 | 0.000000  |
| H | -1.219568 | -5.353390 | 0.000000  |

8

|   |           |           |           |
|---|-----------|-----------|-----------|
| C | 1.408552  | 0.467556  | 0.000000  |
| C | 1.963181  | -0.817437 | 0.000000  |
| C | 1.151114  | -1.942515 | 0.000000  |
| C | -0.238859 | -1.836585 | 0.000000  |
| C | -0.816760 | -0.549431 | 0.000000  |
| C | 0.000000  | 0.607256  | 0.000000  |
| H | 3.042022  | -0.919401 | 0.000000  |
| C | 2.261993  | 1.605829  | 0.000000  |
| C | -2.234035 | -0.418266 | 0.000000  |
| C | 3.013629  | 2.546416  | 0.000000  |
| H | 3.663163  | 3.386265  | 0.000000  |
| C | -3.436196 | -0.343362 | 0.000000  |
| H | -4.494587 | -0.257823 | 0.000000  |
| C | -0.589850 | 1.899645  | 0.000000  |
| C | -1.085424 | 2.996717  | 0.000000  |
| H | -1.522440 | 3.964264  | 0.000000  |
| H | 1.605171  | -2.928181 | 0.000000  |
| C | -1.108181 | -3.065466 | 0.000000  |
| H | -1.763644 | -3.086799 | 0.877112  |
| H | -1.763644 | -3.086799 | -0.877112 |

|   |           |           |          |
|---|-----------|-----------|----------|
| H | -0.501020 | -3.973667 | 0.000000 |
|---|-----------|-----------|----------|

**9**

|   |           |           |           |
|---|-----------|-----------|-----------|
| C | -0.002128 | -0.008506 | 1.217593  |
| C | -0.005068 | -1.408433 | 1.196037  |
| C | -0.003144 | -2.124172 | 0.000000  |
| C | -0.005068 | -1.408433 | -1.196037 |
| C | -0.002128 | -0.008506 | -1.217593 |
| C | 0.000426  | 0.713682  | -0.000000 |
| H | -0.010508 | -1.936727 | 2.143306  |
| H | -0.010508 | -1.936727 | -2.143306 |
| C | -0.005068 | 0.669900  | 2.469094  |
| C | 0.024478  | -3.632341 | 0.000000  |
| C | -0.005068 | 0.669900  | -2.469094 |
| C | -0.007041 | 1.212276  | 3.543932  |
| H | -0.008684 | 1.705555  | 4.484161  |
| C | -0.007041 | 1.212276  | -3.543932 |
| H | -0.008684 | 1.705555  | -4.484161 |
| C | 0.001148  | 2.133377  | -0.000000 |
| C | 0.002290  | 3.337310  | -0.000000 |
| H | 0.003510  | 4.398938  | -0.000000 |
| H | 1.055317  | -4.006935 | 0.000000  |
| H | -0.469980 | -4.039822 | 0.886112  |
| H | -0.469980 | -4.039822 | -0.886112 |

**10**

|   |           |           |           |
|---|-----------|-----------|-----------|
| C | 4.236041  | 0.023815  | -0.540329 |
| C | 3.223433  | -0.919193 | -0.387874 |
| C | 1.978069  | -0.549134 | 0.123475  |
| C | 1.759418  | 0.783525  | 0.474366  |
| C | 2.770907  | 1.728237  | 0.320757  |
| C | 4.012361  | 1.351899  | -0.185559 |
| H | 3.402039  | -1.952618 | -0.671132 |
| H | 0.790865  | 1.082384  | 0.860788  |
| C | 0.908106  | -1.617463 | 0.327003  |
| H | 1.071293  | -2.431625 | -0.390834 |
| H | 1.035774  | -2.073798 | 1.320380  |
| H | 2.585610  | 2.761522  | 0.595230  |
| H | 4.798760  | 2.089130  | -0.307479 |
| H | 5.197504  | -0.279214 | -0.941726 |
| C | -0.463551 | -1.149195 | 0.208463  |
| C | -1.610670 | -0.764614 | 0.118691  |
| C | -2.888846 | -0.337425 | 0.017563  |
| C | -4.041310 | 0.048310  | -0.071080 |
| C | -5.320929 | 0.476466  | -0.169859 |
| C | -6.465134 | 0.859513  | -0.257303 |

|   |           |          |           |
|---|-----------|----------|-----------|
| H | -7.469220 | 1.195779 | -0.335108 |
|---|-----------|----------|-----------|

**11**

|   |           |           |           |
|---|-----------|-----------|-----------|
| C | -5.209379 | -0.924003 | -0.000249 |
| H | -5.521161 | -1.966742 | -0.000801 |
| C | -6.152479 | 0.036153  | 0.000436  |
| C | -3.819491 | -0.699245 | -0.000314 |
| C | -2.607062 | -0.559366 | -0.000400 |
| C | -1.274830 | -0.394979 | -0.000485 |
| C | -0.058203 | -0.246121 | -0.000553 |
| C | 1.269623  | -0.085049 | -0.000630 |
| C | 2.486322  | 0.061818  | -0.000667 |
| C | 3.819223  | 0.223200  | -0.000722 |
| C | 5.031813  | 0.353517  | -0.000712 |
| C | 6.424592  | 0.564394  | -0.000897 |
| H | 6.747135  | 1.604707  | -0.004181 |
| C | 7.345667  | -0.409877 | 0.002622  |
| H | 7.066838  | -1.457210 | 0.005947  |
| H | 8.403372  | -0.173889 | 0.002233  |
| H | -7.191345 | -0.285936 | 0.000399  |
| C | -5.909214 | 1.509325  | 0.001243  |
| H | -4.842854 | 1.744758  | 0.001302  |
| H | -6.370791 | 1.978343  | -0.876768 |
| H | -6.370681 | 1.977365  | 0.879832  |

**12**

|   |           |           |           |
|---|-----------|-----------|-----------|
| C | -5.062330 | 0.533918  | -0.002162 |
| H | -5.439065 | 1.556686  | -0.007333 |
| C | -5.936723 | -0.487483 | 0.003526  |
| H | -5.548595 | -1.503496 | 0.008676  |
| C | -3.663318 | 0.385143  | -0.001949 |
| C | -2.445901 | 0.304477  | -0.001997 |
| C | -1.108019 | 0.196523  | -0.001921 |
| C | 0.113668  | 0.097352  | -0.001822 |
| C | 1.446742  | -0.012162 | -0.001694 |
| C | 2.668080  | -0.113688 | -0.001562 |
| C | 4.005946  | -0.226910 | -0.001402 |
| C | 5.222356  | -0.314895 | -0.001133 |
| C | -7.422218 | -0.331954 | 0.003346  |
| H | -7.721285 | 0.719669  | -0.001963 |
| H | -7.866866 | -0.822132 | -0.871980 |
| H | -7.866131 | -0.813038 | 0.884074  |
| C | 6.621551  | -0.477830 | -0.001232 |
| H | 6.979381  | -1.506545 | -0.008011 |
| C | 7.509078  | 0.527082  | 0.006286  |
| H | 7.194914  | 1.564343  | 0.013159  |



|   |          |          |          |
|---|----------|----------|----------|
| H | 8.574175 | 0.327076 | 0.005681 |
|---|----------|----------|----------|

**13**

|   |           |           |           |
|---|-----------|-----------|-----------|
| C | 0.515895  | -0.667916 | -0.318415 |
| C | 1.931930  | -0.827376 | 0.242491  |
| C | 1.931906  | 0.827323  | 0.242498  |
| C | 0.515899  | 0.667922  | -0.318431 |
| C | 2.074820  | -0.000026 | 1.505377  |
| H | 3.045080  | -0.000047 | 1.996670  |
| H | 1.230845  | -0.000041 | 2.190348  |
| C | 3.157209  | -0.667660 | -0.650227 |
| C | 3.157173  | 0.667703  | -0.650211 |
| C | -3.371611 | -0.689018 | 0.036865  |
| C | -2.161613 | -1.444522 | -0.057263 |
| C | -1.020997 | -0.716268 | -0.198137 |
| C | -1.020950 | 0.716247  | -0.198140 |
| C | -2.161557 | 1.444527  | -0.057241 |
| C | -3.371571 | 0.689050  | 0.036903  |
| H | -4.314698 | -1.220627 | 0.111253  |
| H | -2.178068 | -2.527465 | -0.005350 |
| H | -2.177960 | 2.527467  | -0.005250 |
| H | -4.314633 | 1.220698  | 0.111355  |
| H | 3.825173  | -1.423596 | -1.047712 |
| H | 3.825062  | 1.423693  | -1.047725 |

**14**

|   |           |           |           |
|---|-----------|-----------|-----------|
| C | 3.704565  | -0.294662 | -0.095331 |
| C | 2.380580  | -0.214654 | -0.100514 |
| C | 1.130958  | -0.139237 | -0.105754 |
| C | -0.158893 | -0.061124 | -0.111706 |
| C | -1.437231 | 0.016240  | -0.117683 |
| C | -2.697209 | 0.092412  | -0.123321 |
| C | -4.007749 | 0.174099  | -0.129997 |
| C | -5.241640 | 0.236858  | -0.128040 |
| C | -6.630966 | 0.379051  | -0.142578 |
| H | -7.007114 | 1.238594  | -0.698206 |
| C | -7.504678 | -0.410683 | 0.510021  |
| H | -8.563119 | -0.180618 | 0.509346  |
| H | -7.177494 | -1.266928 | 1.087674  |
| C | 6.374762  | -0.446283 | -0.083213 |
| C | 7.087496  | 0.830898  | 0.401139  |
| H | 6.792643  | 1.074666  | 1.424914  |
| H | 6.713073  | -0.704641 | -1.096932 |
| H | 6.670466  | -1.301641 | 0.541232  |
| H | 8.172202  | 0.690659  | 0.376684  |
| H | 6.833744  | 1.681493  | -0.236484 |

|   |          |           |           |
|---|----------|-----------|-----------|
| C | 4.927604 | -0.368179 | -0.091063 |
|---|----------|-----------|-----------|

**TS for planarization**

|   |           |           |           |
|---|-----------|-----------|-----------|
| C | 0.000000  | 0.000000  | 0.000000  |
| C | 0.000000  | 1.135560  | 1.147900  |
| C | 0.000000  | 1.135560  | -1.147900 |
| C | -0.000000 | -1.135560 | -1.147900 |
| C | -0.000000 | -1.135560 | 1.147900  |
| C | 0.000000  | -2.416882 | -0.706120 |
| C | 0.000000  | 0.662528  | 2.520985  |
| C | -0.000000 | -0.662528 | -2.520985 |
| C | 0.000000  | 2.416882  | 0.706120  |
| C | -0.000000 | -0.662528 | 2.520985  |
| C | 0.000000  | 0.662528  | -2.520985 |
| C | 0.000000  | 2.416882  | -0.706120 |
| C | -0.000000 | -2.416882 | 0.706120  |
| H | 0.000000  | 3.266878  | -1.374750 |
| H | -0.000000 | 3.266878  | 1.374750  |
| H | 0.000000  | 1.354629  | 3.351885  |
| H | -0.000000 | -1.354629 | 3.351885  |
| H | -0.000000 | -3.266878 | 1.374750  |
| H | -0.000000 | -3.266878 | -1.374750 |
| H | -0.000000 | -1.354629 | -3.351885 |
| H | 0.000000  | 1.354629  | -3.351885 |

**TS for  $\pi$ -bond shift**

|   |           |           |           |
|---|-----------|-----------|-----------|
| C | 0.000000  | 0.000000  | 0.238873  |
| C | 0.000000  | 1.471056  | 0.762428  |
| C | -1.392663 | 0.000000  | -0.436982 |
| C | -0.000000 | -1.471056 | 0.762428  |
| C | 1.392663  | -0.000000 | -0.436982 |
| C | 1.176452  | -2.122761 | 0.291611  |
| C | 1.176452  | 2.122761  | 0.291611  |
| C | -1.176452 | -2.122761 | 0.291611  |
| C | -1.176452 | 2.122761  | 0.291611  |
| C | 1.981319  | 1.276735  | -0.454857 |
| C | -1.981319 | -1.276735 | -0.454857 |
| C | -1.981319 | 1.276735  | -0.454857 |
| C | 1.981319  | -1.276735 | -0.454857 |
| H | -2.983952 | 1.486918  | -0.803551 |
| H | -1.361908 | 3.181202  | 0.448383  |
| H | 1.361908  | 3.181202  | 0.448383  |
| H | 2.983952  | 1.486918  | -0.803551 |
| H | 2.983952  | -1.486918 | -0.803551 |
| H | 1.361908  | -3.181202 | 0.448383  |
| H | -1.361908 | -3.181202 | 0.448383  |

H    -2.983952   -1.486918   -0.803551
